## 1 Alkane and wax ester production from lignin derived molecules

2 Milla Salmela\*<sup>a</sup>, Tapio Lehtinen <sup>a</sup>, Elena Efimova <sup>a</sup>, Suvi Santala <sup>a</sup>, Ville Santala <sup>a</sup>

3 <sup>a</sup> Laboratory of Chemistry and Bioengineering, Tampere University of Technology, Korkeakoulunkatu

4 8, 33720 Tampere, Finland

5 \*Corresponding author

6 Funding: Academy of Finland, grant no. 310135, 310188, 311986

## 7 Abstract

8 Lignin has potential as a sustainable feedstock for microbial production of industrially relevant  
9 molecules. However, the required lignin depolymerization yields a heterogenic mixture of aromatic  
10 monomers that are challenging substrates for the microorganisms commonly used in industry. Here,  
11 we investigated the properties of lignin-derived molecules (LDMs), namely coumarate, ferulate, and  
12 caffeate, in the synthesis of biomass and products in a LDM-utilizing bacterial host *Acinetobacter*  
13 *baylyi* ADP1. The biosynthesis products, wax esters and alkanes, are relevant compounds for the  
14 chemical and fuel industries. In *A. baylyi* ADP1, wax esters are produced by a native pathway,  
15 whereas alkanes are produced by a synthetic pathway introduced to the host. Using individual LDMs  
16 as substrates, the growth, product formation, and toxicity to cells were monitored with internal  
17 biosensors. Of the tested LDMs, coumarate was the most propitious in terms of product synthesis.  
18 Wax esters were produced from coumarate with a yield and titer of 40 mg /g<sub>coumarate</sub> and 221 mg/L,  
19 whereas alkanes were produced with a yield of 62.3 µg /g<sub>coumarate</sub> and titer of 152 µg/L. This study  
20 demonstrates the microbial preference for certain LDMs, and highlights the potential of *A. baylyi*  
21 ADP1 as a convenient host for LDM upgrading to value-added products.

22 Key words: Lignin, alkane, wax ester, *Acinetobacter baylyi* ADP1

## 23 Introduction

24 Microbial processes utilizing non-edible biomass as a substrate can offer a sustainable solution for  
25 the production of fuels and chemicals. Comprehensive utilization of cheap waste streams obtained  
26 from agriculture and forest industry, could improve the economic viability of the bioprocesses  
27 (FitzPatrick et al., 2010), (Elshahed, 2010), (Clark et al., 2006), (Steen et al., 2010)(Peralta-Yahya et  
28 al., 2012). Currently lignin, one of the most abundant biopolymers, is underutilized mainly due to its  
29 recalcitrance and heterogeneity. Because of the complex structure, feedstock originating from  
30 lignocellulose and lignin treatment processes contain a heterogeneous mixture of compounds,  
31 including phenols, acids and residual sugars (Katahira et al., 2016)(Constant et al., 2016)(Abdelkafi et  
32 al., 2011)(Sun et al., 2015)(Li et al., 2012) (Karp et al., 2016) (Raj et al., 2007). Many lignin-derived  
33 molecules (LDMs) are growth inhibitors poorly tolerated by the most commonly used microbial  
34 production hosts, such as *Escherichia coli* and *Saccharomyces cerevisiae*. (Rumbold et al., 2009)(Sun  
35 et al., 2001)(Palmqvist and Hahn-Hägerdal, 2000)(Jönsson and Martín, 2016)(Adeboye et al., 2014).  
36 More importantly, these strains lack the catabolic pathways for LDM utilization. Thus, increasing  
37 attention is given towards microbial hosts that are capable of tolerating and metabolizing the LDMs,  
38 and can be employed as modular cell factories for the synthesis of products of interest (Nielsen et  
39 al., 2009)(Freed et al., 2018).

40 *Acinetobacter baylyi* ADP1 is an example of a wide substrate range bacterium that can degrade and  
41 utilize LDMs for growth and biosynthetic pathways. In *A. baylyi* ADP1, aromatic compounds are  
42 channeled to the central metabolism *via* a  $\beta$ -ketoadiapate pathway (Bleichrodt et al., 2010) . In this  
43 upper funneling pathway, structurally different compounds are converted to central intermediates,  
44 protocatechuate or catechol, before entering the  $\beta$ -ketoadiapate pathway and eventually resulting  
45 in common metabolites acetyl-CoA and succinyl-CoA (Ornston, 1966)(Fuchs et al., 2011) (Fischer et  
46 al., 2008). Thus, the  $\beta$ -ketoadiapate pathway could be exploited in the synthesis of a broad range of  
47 acetyl-CoA derived compounds from lignin-derived feedstock. Previous demonstrations of microbial  
48 upgrading of LDMs include the production of medium-chain (C<sub>6</sub>-C<sub>14</sub>) polyhydroxyalkanoates (PHA) by  
49 *Pseudomonas putida* (Linger et al., 2014) and triacylglycerols by *Rhodococcus opacus* (Kosa and

50 Ragauskas, 2012). Lignin-derived phenolic compounds such as coumarate, ferulate and caffeate are  
51 structural analogues metabolized through the protocatechuate branch of the upper funneling  
52 pathway (Fischer et al., 2008). The occurrence and position of substitution groups in the aromatic  
53 ring may affect the biochemical reactions and inhibitory effects of these compounds. On the other  
54 hand, the diversity of phenolic compounds released from biomass depends on the chosen pre-  
55 treatment method and the origin of the biomass (Constant et al., 2016). Thus, studies on the  
56 substrate preferences of the microbial cell factories promotes preferable choice of biomass and  
57 pretreatment methods.

58 In addition to LDM utilization, *A. baylyi* ADP1 has interesting features of being readily genetically  
59 engineered organism (Metzgar, 2004) (Elliott and Neidle, 2011) (de Berardinis et al., 2008) that also  
60 accumulates industrially relevant long-chain alkyl esters (wax esters) . Similarly to other storage  
61 lipids, wax esters are produced intracellularly in nitrogen-deficient conditions with excess carbon  
62 reserves (Alvarez and Steinbüchel, 2003)(Fixter et al., 1986)(Santala et al., 2014). The wax esters  
63 produced by *A. baylyi* ADP1 resemble the structure of jojoba-oil (produced by *Simmondsia chinensis*)  
64 with a typical carbon content of C<sub>32</sub>-C<sub>36</sub> (Fixter et al., 1986)(Kalscheuer and Steinbüchel 2003)  
65 (Lehtinen et al., 2018a), The composition of wax esters can be modified by alternating process  
66 conditions (Dewitt et al., 1982) or by genetically rewiring pathways (Santala et al. 2014), presenting  
67 further opportunities in product tailoring. On the other hand, genome integrated synthetic pathways  
68 provide practical means to produce non-native products of industrial relevance. For example, we  
69 have previously constructed an *A. baylyi* ADP1 strain that accumulates intracellular alkanes by  
70 expressing a non-native fatty acid reductase (AAR) and an aldehyde deformylating oxygenase (ADO)  
71 (Lehtinen et al., 2017b). In the strain, the naturally occurring alkane degradation and wax ester  
72 synthesis pathways of *A. baylyi* ADP1 were disrupted by targeted gene knock-outs and an optimized  
73 alkane production pathway was integrated (Lehtinen et al., 2017b). Microbial wax esters and alkanes  
74 have previously been produced using carbon sources such as glucose and organic acids (Kannisto et

75 al., 2014) (Lehtinen et al., 2018a)(Salmela et al., 2018a) (Santala et al., 2011) (Schirmer et al.,  
76 2010)(Lehtinen et al., 2017b)(Cao et al., 2016) (Fatma et al., 2018)(Lehtinen et al., 2017a).

77 Here, we demonstrate the production of wax esters ( $C_{32-34}$ ) and alkanes ( $C_{17}$ ) by *A. baylyi* ADP1 from  
78 LDMs, namely ferulate, caffeate, and coumarate. We profiled the growth and tolerance against  
79 these aromatic compounds, and determined how efficiently the compounds are directed to the  
80 synthesis pathways of interest. Thereafter, we utilized the native pathway of *A. baylyi* ADP1 to  
81 produce long chain alkyl esters (wax esters) from the most optimal compound (coumarate). To  
82 demonstrate the metabolic flexibility of *A. baylyi* and the potential of LDMs as a feedstock for a  
83 range of industrially relevant products, we also produced alkanes from coumarate by an engineered  
84 strain.

## 85 **Materials and methods**

### 86 **Strains, media and components**

87 *A. baylyi* ADP1 'sensor-strain' (Santala et al. 2011) –designated here as the wax ester producing WP  
88 strain — was used for internal aldehyde monitoring and wax ester production. The WP strain  
89 originates from the wild type strain *A. baylyi* ADP1 (DSM 24193) with a bacterial luciferase gene  
90 *luxAB* replacing gene *poxB* (ACIAD3381) associated with pyruvate dehydrogenase activity. The WP  
91 strain genotype is *A. baylyi* ADP1 $\Delta$ *poxB::luxAB*,cm<sup>r</sup>. A biosensor strain originating from the same  
92 wild type modified to produce alkanes instead of wax esters (Lehtinen et al. 2017a) – designated as  
93 the alkane producing AP strain— was used for internal aldehyde and alkane monitoring, and alkane  
94 production. In this strain, the gene encoding native alkane degrading activity (AlkM) of *A. baylyi* has  
95 been replaced by GFP-gene under a native alkane inducible promoter. Additionally, it has two non-  
96 native genes *aar* (acyl-acyl carrier protein (ACP) reductase) and *ado* (aldehyde-deformylating  
97 oxygenase) from *Synechococcus elongates* integrated in the genome replacing a putative prophage  
98 segment (pp2), to allow alkane synthesis. The gene expression from this synthetic alkane-producing  
99 pathway is controlled by LacI and isopropyl  $\beta$ -D-1-thiogalactopyranoside (IPTG) inducible promoter.

100 Furthermore, the strain AP has the genes ACIAD3383-3381 knocked-out and replaced by the  
101 bacterial luciferase genes *luxAB*. The ACIAD3383 (*acr1*) is associated with reduction of fatty acyl-CoA,  
102 thus its elimination removes the native long chain fatty aldehyde production related to the wax ester  
103 production. The genotype of AP strain is *A. baylyi*  
104 *ADP1ΔpoxBΔmetYΔacr1::luxAB,cm<sup>r</sup>ΔalkM::sfjfp,kan<sup>r</sup>Δpp2::aar,ado,spc<sup>r</sup>*.

105 All cultivations were done in mineral salts media (Hartman et al. 1989) with some modifications  
106 (K<sub>2</sub>HPO<sub>4</sub> 3.88 g/L, NaH<sub>2</sub>PO<sub>4</sub> 1.63 g/L, (NH<sub>4</sub>)<sub>2</sub>SO<sub>4</sub> 2.00 g/L, MgCl<sub>2</sub>·6H<sub>2</sub>O 0.1 g/L, EDTA 10 mg/L,  
107 ZnSO<sub>4</sub>·7H<sub>2</sub>O 2 mg/L, CaCl<sub>2</sub>·2H<sub>2</sub>O 1 mg/L, FeSO<sub>4</sub>·7H<sub>2</sub>O 5 mg/L, Na<sub>2</sub>MoO<sub>4</sub>·2H<sub>2</sub>O 0.2 mg/L, CuSO<sub>4</sub>·5H<sub>2</sub>O 0.2  
108 mg/L, CoCl<sub>2</sub>·6H<sub>2</sub>O 0.4 mg/L, MnCl<sub>2</sub>·2H<sub>2</sub>O 1 mg/L) supplemented with 0.2% casein amino acids and  
109 antibiotics when required (kanamycin 50 μg/μL). Sodium acetate (25 mM) and coumarate, ferulate,  
110 or caffeate (15 mM) were used as carbon sources if not stated otherwise. IPTG (100 μM)  
111 (ThermoFisher, USA) was used for induction of the alkane production. All analytical compounds were  
112 purchased either from Sigma (USA) or Tokyo chemical industries (Japan).

### 113 **Comparison of different LDMs as carbon source**

114 Growth and fatty aldehyde formation of the wax ester producing WP strain and the AP strain were  
115 measured on 96-well plates (Greiner Bio-one, Austria). The cells were incubated in a total volume of  
116 200 μL and supplemented with 25 mM of acetate and either 15 mM of coumarate, ferulate, or  
117 caffeate. Cultivations supplemented with either 25 mM acetate or 0.2% casein amino acids were  
118 used as control cultivations. The cells were cultivated in Spark microplate reader (Tecan,  
119 Switzerland) at 30 °C for 30 hours. Luminescence and optical density (OD) at 600 nm were measured  
120 at 30 min intervals and the plate was shaken for 5 min before reading (108 rpm, 2.5 mm amplitude).  
121 Additionally, luminescence and fluorescence signals (excitation 485±10 nm, emission 510±5 nm)  
122 were measured from the AP strain. The fluorescence signal was divided by the maximum OD<sub>600</sub> value  
123 to indicate produced alkanes per biomass. Media supplemented with the corresponding carbon  
124 source without inoculant were used as blanks and the background signal was subtracted from the

125 obtained sample values. All cultivations were conducted in triplicates. The AP strain was induced  
126 with 100  $\mu$ M IPTG and supplemented with kanamycin (50  $\mu$ g/mL). Similar setup was used for  
127 studying substrate toxicity with the WP strain except that acetate (25-200 mM) and coumarate (13-  
128 120 mM) mixtures of various concentrations were used as carbon sources in 48 h cultivations.

#### 129 **Alkane and wax ester production from coumarate in 50 ml batch cultures**

130 The WP and AP strains were grown on 25 mM acetate and 15 mM coumarate for 24 hours in a total  
131 volume of 50 mL in 250 ml flasks at 30 °C and 300 rpm. Samples for analyses were collected after 8,  
132 12 and 24 h of cultivation. Acetate and coumarate concentrations were measured with HPLC and cell  
133 growth (OD) was measured with spectrophotometer at 600 nm. Alkanes and wax esters were  
134 analyzed from extracted lipids with thin layer chromatography (TLC) (wax esters) or gas  
135 chromatography-mass spectrometry (GC-MS) (alkanes) as described in analytical methods. Control  
136 cultivations contained 0.2% casein amino acids or 0.2% casein amino acids and 25 mM acetate. All  
137 cultivations were done as triplicates. The C/C yield was calculated by dividing the carbon content of  
138 heptadecane with the carbon content of the substrates (acetate and coumarate) after subtracting  
139 the titer from the casein amino acid control cultivation. Similarly, the yield was calculated as  
140  $\text{g/g}_{\text{coumarate}}$  consumed after subtracting the titer from the acetate control cultivation.

#### 141 **Wax ester production from coumarate in 1-L bioreactor**

142 Larger scale bioreactor experiment was conducted with the WP strain in a 1-liter reactor (Sartorius  
143 Biostat B plus Twin System, Germany) with an online pH and  $\text{pO}_2$  monitoring system and automated  
144  $\text{O}_2$  feed. An initial media volume of 750 ml was supplemented with 25 mM of acetate and 15 mM  
145 coumarate and inoculated with the WP strain pre-cultivated in 100 mM acetate, the initial OD being  
146 0.14. Temperature was set to 30 °C and stirring to 300 rpm. Samples were collected periodically  
147 either as 50 ml (for NMR, CDW, HPLC measurements) or as 5 ml (HPLC and OD measurements).  
148 Coumarate was supplemented to the reactor after carbon depletion in a total volume of 20 ml in  
149 concentrations of either 24.5 mM or 34.5 mM. The mg/g yield for wax esters were calculated with

150 an average chain length of 34 carbons (506 g/mol) (Lehtinen et al., 2018b) from the 34.5 mM  
151 coumarate supplementation.

## 152 **Analytical methods**

153 Acetate, coumarate and 4-HBA concentrations were measured with HPLC (Agilent 1100 series,  
154 HewlettPackard, Germany) equipped with Fast acid H+ column (Phenomex, USA), a degasser  
155 (G1322A) and an UV-detector (G1315A) using 0.005 N H<sub>2</sub>SO<sub>4</sub> as eluent. The pump (G1211A) flow was  
156 adjusted to 1 ml/min, the column temperature to 80 °C, and peaks were identified at wavelength  
157 310 nm for coumarate and 210 nm for acetate and 4-HBA by comparing the retention times and  
158 spectral profiles to prepared standards.

159 Wax esters and alkanes were extracted from cells by methanol-chloroform extraction as described  
160 previously (Santala et al., 2011): extraction was conducted for cell pellets obtained by centrifugation  
161 (12 000 g x 5 min) from equal volumes of cell cultures (12 ml). The cell pellets were suspended in  
162 methanol (500 µl), chloroform was added (250 µl), and the samples were incubated at room  
163 temperature with gentle mixing for 1 hour. Thereafter, chloroform (250 µl) and PBS (250 µl) were  
164 added, and the gentle mixing was continued for two more hours. Finally, the samples were  
165 centrifuged and the lower phase (chloroform) was used for analyses.

166 Thin layer chromatography (TLC) analysis was carried out with 10 × 10 cm HPTLC Silica Gel 60 F254  
167 glass plates with 2.5 × 10 cm concentrating zone (Merck, USA). Extracted samples were loaded on  
168 the plate (30 µl) and jojoba-oil was used as a standard for wax esters. The mobile phase consisted of  
169 n-hexane:diethylether:acetic acid (90:15:1). For visualization, the plate was stained with iodine.

170 Alkanes were measured with GC-MS (Agilent Technologies 6890N/5975B) equipped with HP-5MS  
171 30 m × 0.25 mm column with 0.25 µm film thickness. Helium flow rate was adjusted to 4.7 ml/min  
172 and a 1 µl splitless injection was used. The oven program was adjusted to 55 °C hold 5 min, 55–  
173 280 °C 20°/min ramp and 280 °C hold 3 min. Scanning occurred at 50-500 *m/z*, 1.68 scan/s.  
174 Chromatograph peaks were identified based on the NIST library (Version 2.2/Jun 2014) and on

175 heptadecane external standards (Sigma-Aldrich, USA). The accumulation of 8-heptadecene was  
176 determined only qualitatively by comparing the chromatograph peaks within the samples and to the  
177 GC library as a standard compound was not commercially available.

178 NMR was used for quantitative wax ester analysis as described by Santala et al. (2011). Briefly,  
179 samples were prepared by collecting cell pellets from 40 ml of cell culture by centrifugation and  
180 freeze-drying the cell pellet (ALPHA 1-4 LD plus freeze dryer, Martin Christ, Germany). Cell dry  
181 weight (CDW) was measured from the freeze-dried cell pellets before lipid extraction for  $^1\text{H}$  NMR  
182 measurements (Varian Mercury spectrometer, 300 MHz). The samples were dissolved chloroform  
183 with trifluorotoluene as an internal standard and the spectra was measured. Data was processed  
184 with ACD NMR processor program and interpreted accordingly. This NMR method quantifies  $\alpha$ -  
185 alkoxy methylene protons of ester bonds that are specific to wax esters.

## 186 **Results and Discussion**

187 *A. baylyi* ADP1 belongs to a bacterial species capable of metabolizing a variety of aromatic  
188 compounds by enzymatically funneling them towards central intermediates. The compounds are  
189 metabolized via the  $\beta$ -ketoacetyl-CoA pathway to succinyl-CoA and acetyl-CoA (Wells and Ragauskas,  
190 2012). As the latter is an essential intermediate for the synthesis of fatty-acid derived products, such  
191 as the naturally produced wax esters in *A. baylyi* (Reiser and Somerville, 1997), (Stöveken and  
192 Steinbüchel, 2008) (Uthoff and Stöveken, 2005), the aromatic-catabolizing pathway could potentially  
193 provide means to utilize lignin-derived molecules for the production of long-chain carbon  
194 compounds. We investigated the ability of *A. baylyi* ADP1 to utilize lignin-derived molecules for wax  
195 ester and alkane synthesis, and determined how structural differences of the selected aromatic  
196 compounds affect biomass and product synthesis. We employed two ADP1 strains described  
197 previously: The first one, designated here as 'WP', synthesizes wax esters *via* the native synthesis  
198 pathway (Santala et al., 2011). The strain exhibits a previously described bioluminescence based -  
199 sensor for the detection of long-chain aldehydes, that are specific intermediates in the wax ester



200 synthesis pathway (Lehtinen et al., 2018a; Santala et al., 2011). The second strain, designated here  
201 as 'AP', is engineered for the synthesis of alkanes by a non-native pathway, and contains a sensor  
202 system for the detection of both aldehydes (a precursor in alkane synthesis) monitored via  
203 bioluminescence, and alkanes, detected as fluorescence (Lehtinen et al., 2017b). To avoid  
204 degradation of the produced alkanes or direction of acetyl-CoA to wax esters instead of alkanes, the  
205 native alkane-degrading pathway and the wax ester synthesis pathway of *A. baylyi* ADP1 have been  
206 disrupted. The proposed carbon flow from substrate to product in the strains WP and AP is  
207 presented in Figure 1.

### 208 **Product synthesis and biomass from LDM representatives**

209 The WP and AP strains were employed to study the potential of coumarate, ferulate and caffeate as  
210 carbon sources for simultaneous product synthesis and biomass formation. Cultivations were carried  
211 out by supplementing 15 mM of coumarate, ferulate or caffeate together with 25 mM of acetate.  
212 The WP strain utilized both coumarate and ferulate efficiently, although product formation  
213 measured as luminescence signal was higher from coumarate (Figures 2A, 2B and 2C). Biomass, on  
214 the other hand, was produced rather similarly between these two compounds. In both cases, growth  
215 ceased within 20 hours followed by a rapid drop in the luminescence signal (Figure 2B). Caffeate  
216 supplementation, on the other hand, revealed possible inhibition by the compound seen as  
217 prolonged lag phase, and low luminescence signal and biomass formation (Figures 2A, 2B and 2C).  
218 However, ADP1 wild type has previously been shown to consume caffeate at a lower concentration  
219 of 10 mM (Salmela et al., 2018b).

220 The optical density, luminescence and fluorescence profiles of the AP strain show similar substrate  
221 preferences as with the WP strain; coumarate and ferulate were efficiently utilized for simultaneous  
222 biomass and alkane production (Figures 3A, 3B, 3C and 3D). Although caffeate supplementation  
223 yielded somewhat better growth for the AP strain than with the WP strain (Figure 3A), low  
224 luminescence and fluorescence signals indicate inefficient direction of substrate for the product

225 formation (Figures 3c and 3D). Estimated by the fluorescence signal, alkane production was highest  
226 with coumarate as the carbon source (Figure 3D). This correlates with the higher cumulative  
227 luminescence obtained from coumarate-supplemented cultivations compared to the other carbon  
228 sources (3C). Furthermore, the cumulative luminescence signal produced by the AP strain from  
229 coumarate was 11.5 fold higher than with the WP strain. The heterologous enzyme AAR is more  
230 efficient in supplying aldehyde substrate for the bacterial luciferase LuxAB, which explains the higher  
231 obtained luminescence signal (Lehtinen et al., 2017b; Lehtinen et al., 2018a). Thus, the architecture  
232 and the comprising enzymes of a production pathway may have a significant role in determining the  
233 production yield in the context of LDM utilization.

234 The biochemistry of the funnelling pathway in *A. baylyi* is similar to those of the other  $\beta$ -ketoacidipate  
235 utilizing microorganism, such as *Pseudomonas putida* (Parke et al., 2000)(Harwood and Parales,  
236 1996). In both microorganisms, LDMs such as coumarate, ferulate and caffeate are converted  
237 through the protocatechuate branch to single intermediates. The biocatalytic efficiencies of the first  
238 enzymatic steps of this upper funneling pathway may vary between the carbon sources. For  
239 example, muconate production by a genetically engineered *P. putida* KT2440-CJ102 yielded slightly  
240 higher conversion rates for coumarate than ferulate (Johnson et al., 2017). The structural  
241 differences between the studied LDMs might explain why coumarate is favored over ferulate and  
242 caffeate. Ferulate requires demethylation of the aromatic structure, whereas the aromatic ring  
243 structure of coumarate can be directly hydroxylated to the central intermediate protocatechuate. 4-  
244 HBA and vanillate are produced as overflow metabolites from coumarate and ferulate (Parke and  
245 Ornston, 2003), and although not yet fully elucidated in *A. baylyi*, the transport efficiencies of these  
246 compounds may also vary. Although real lignin-derived streams are more complex in their  
247 composition than these model compounds, studies on individual compounds reveal valuable details  
248 about the host metabolism for future process design.

249 **Tolerance to combined effects of coumarate and acetate**

250 Microorganisms with high tolerance towards inhibitory compounds, such as aromatics and acetate,  
251 are attractive candidates for the possible upgrading of lignin-derived molecules to value added  
252 products. Acetate has been associated as a part of hardwood lignins (Lu and Ralph, 2010), as well as  
253 a residual components produced by lignocellulose treatment processes (Jönsson and Martín, 2016).  
254 Previously, *A. baylyi* has been shown to tolerate and utilize acetate as a sole carbon source at  
255 concentrations as high as 200 mM (Lehtinen et al., 2017b). Complex substrate regulation systems in  
256 *A. baylyi* include global regulators causing, for example, carbon-catabolite repression, as well as  
257 vertical and horizontal regulation by intermediates (Bleichrodt et al., 2010). For example, *A. baylyi*  
258 ADP1 prefers acetate as a carbon sources over the aromatic compounds (Zimmermann et al., 2009).  
259 Consequently, this regulation may result in sequential use of the carbon sources, slower conversion  
260 rates, and eventually in inefficient product formation and substrate utilization. On the other hand,  
261 reactions occurring at the  $\beta$ -ketoacid pathway are oxygenase mediated, and do not provide ATP  
262 reserves (Ornston and Stanier, 1966). Thus, an alternative carbon source typical for lignin processes,  
263 such as acetate, provides means to accelerate cellular growth.

264 To determine the effect of acetate on coumarate utilization and to elaborate the inhibitory effect of  
265 using a mixture of coumarate and acetate, the WP strain was cultured at different concentrations of  
266 acetate (25-90 mM) and coumarate (15-50 mM). Coumarate was chosen as a model compound  
267 based on the results obtained from the product synthesis experiments with different LDM-  
268 representatives. With acetate and coumarate concentrations up to 55 mM and 30 mM, respectively,  
269 efficient formation of biomass and products was observed, whereas with 75 mM acetate and 45 mM  
270 coumarate, cell viability was severely impaired (Figures 4, 4B). Furthermore, higher substrate  
271 concentrations promoted more diauxic growth. In addition to substrate inhibition, elevated  
272 concentrations of the metabolic key intermediates, such as carboxymuconate and its precursor  
273 protocatechuate, are toxic to cells (Parke et al., 2000). Towards the end of the experiment, subtle  
274 growth was also observed with the cultures supplemented with 90 mM acetate and 50 mM  
275 coumarate. Although *A. baylyi* tolerates rather high concentrations of acetate and coumarate, lower

276 concentrations allow for faster and more efficient growth and product formation. For comparison,  
277 glucose grown *P. putida* KT2240 and *E. coli* MG1655 were inhibited (33% reduction in growth rate)  
278 by 61 mM and 30.4 mM of coumarate or 65.6 mM and 91.4 mM of acetate, respectively, when  
279 supplemented individually Calero et al. (2017). To obtain higher tolerance towards inhibitory  
280 substrates, strain optimization could be applied through adaptation and laboratory evolution  
281 (Dragosits and Mattanovich, 2013) or by genetic engineering. For example, Benndorf et al. (2001)  
282 showed that by inducing *A. calcoaceticus* 69-V (*A. baylyi* previously referred to as *A. calcoaceticus*)  
283 with 14 mM of phenols or catechols heat shock proteins were produced to increase tolerance  
284 towards oxidative stress. Kohlstedt et al. 2018 achieved a 20% higher tolerance towards catechols in  
285 *P. putida* by expressing native *catA* and *catA2* genes under the same *catA* promoter.

#### 286 **Wax ester and alkane production from coumarate in batch cultures**

287 Based on the previous experiments, coumarate was used as the carbon source for product level  
288 investigation of wax esters and alkane accumulation from LDMs. Products were analyzed after 8, 12  
289 and 24 h from 50 ml cultivations supplemented with 25 mM of acetate and 15 mM of coumarate.  
290 Casein amino acids or 25 mM of acetate and casein amino acids supplementation were used as  
291 control cultivations. As hypothesized, the WP strain was able to produce wax esters from coumarate  
292 (Figure 5, Table 1). Both acetate and coumarate were consumed rather simultaneously (Table 1) in  
293 the studied conditions, although  $6.4 \pm 0.6$  mM 4-HBA had accumulated at the time point of 12 h as an  
294 intermediate from coumarate conversion. Experimental data on substrate preferences of *A. baylyi*  
295 wild type (Supplementary Figure S3) show that 4-HBA –the overflow metabolite from coumarate– is  
296 depleted from the media mainly after all other carbon sources have been depleted. Similarly, after  
297 24 hours, 4-HBA was depleted by the WP strain resulting in a significantly higher biomass compared  
298 to the control cultivations. Cell death caused by carbon depletion was observed as decreased  $OD_{600}$   
299 after 24 hours. The wax ester content increased during the first 12 h, whereas after 24 h, a weaker  
300 wax ester band on TLC was observed (Figure 5). In the acetate control cultivations, the wax esters  
301 were depleted already within 12 h, whereas in the casein amino acid control cultivations wax esters

302 were not detected. The depletion of wax esters in carbon deficient conditions has been recorded for  
303 example by Fixter et al. (1986) and Santala et al. (2011). Therefore, using substrates such as LDM  
304 pose a challenge for wax ester production and preservation due to their inhibitory effects at  
305 elevated concentrations. Unspecific strategies, such as adaptive laboratory evolution could allow the  
306 use of higher substrate concentrations, whereas metabolic engineering can provide means to  
307 circumvent the challenges related storage compound degradation (Lehtinen et al., 2017b).

308 In the AP strain, the gene responsible for alkane degradation has been knocked-out, resulting in an  
309 intracellular product that is non-degradable by the host metabolism. Here, we demonstrated that  
310 the AP strain produced alkanes from coumarate in a 12-hour batch cultivation. In the culture,  
311 acetate and coumarate were depleted within 8 hours, although 11 mM of 4-HBA had accumulated  
312 during this time (Table 2). Already at this time point, heptadecane was detected (Figure 6). After 12  
313 hours, 4-HBA was consumed and a significant increase to 169 µg/L of heptadecane was observed,  
314 whereas production from acetate and casein amino acids control and casein amino acid control was  
315 negligible, 16.8µg/L and 12.0 µg/L respectively. After 24 hours, an intriguing phenomenon was  
316 observed when analyzing the alkanes: although the heptadecane concentration slightly decreased  
317 towards the end of the experiments, the amount of 8-heptadecene increased indicating that double  
318 bond conversion may have taken place inside the cells (Supplementary Figure S3). Furthermore, it is  
319 possible that some of the alkanes were lost in the supernatant due to carbon starvation and cell  
320 lysis. Heptadecane was produced modestly in the batch experiments: the C/C yield from acetate and  
321 coumarate was slightly higher (0.006%) when compared to our previous studies (0.005%) using  
322 acetate as a sole substrate (Lehtinen et al., 2018b). Furthermore, the heptadecane yield from  
323 consumed coumarate was estimated to be 62.3 µg/g. It should be noted that coumarate serves as a  
324 substrate for both biomass formation and product synthesis. For efficient direction of carbon to  
325 product, decoupling of product and biomass synthesis could be achieved by metabolic engineering  
326 (Santala et al., 2018).

### 327 **Wax ester production from coumarate in bioreactor**

328 The WP strain produced wax esters from coumarate effectively in the 50 ml batch studies. Thus, a  
329 bioreactor experiment was conducted to elucidate the dynamics of wax ester accumulation from  
330 coumarate. One of the challenges in maintaining reactions favorable towards product formation  
331 when utilizing LDMs, such as coumarate, is caused by substrate inhibition. With low substrate doses,  
332 swift carbon depletion is followed by rapid wax ester degradation. Interestingly, in our shake-flask  
333 cultivations wax esters were detected even after prolonged carbon starvation. As the ring cleavage  
334 of aromatic compounds by bacteria is an oxygen intensive process (Fuchs et al., 2011), we tested  
335 whether the premature wax ester degradation could be avoided by restricting the metabolic activity  
336 of the cell by limiting the oxygen supply in the bioreactor. Furthermore, we fed the coumarate  
337 gradually in the bioreactor to study the effect of substrate concentration for the wax ester  
338 production.

339 An initial total volume of 750 ml medium was supplemented with 25 mM of acetate and 15 mM of  
340 coumarate and inoculated with the WP strain. After substrate depletion, the reactor was re-  
341 supplemented twice with elevated coumarate concentrations (25 mM and 34 mM). Automated  
342 supply of pure oxygen (1 vvm) was initiated when the pO<sub>2</sub> decreased below 20%. Regardless of the  
343 additional O<sub>2</sub> supply, the pO<sub>2</sub> remained at 0% throughout coumarate utilization and spiked only at  
344 substrate depletion (Figure 7). Both acetate and coumarate were consumed during the first 10 hours  
345 of cultivation and wax esters accumulated at time points of 7, 8 and 9 hours (Figure 7) up to 26  
346 mg/L. However, after carbon depletion, the wax esters were consumed rapidly within 60 minutes at  
347 time point of 10 hours.

348 To study the effect of oxygen in wax ester degradation, the pure oxygen supply was shut off at 12 h  
349 and the reactor was aerated only with an airflow at a rate of 1 vvm. At this point, 25 mM of  
350 coumarate was also added to the reactor. After 12 h cultivation in these conditions, the  
351 supplemented coumarate had been depleted and cell growth observed, though wax esters were not

352 detected (Figure 7). The automated O<sub>2</sub> supply was re-initiated and an elevated concentration of  
353 coumarate was added to the reactor. Re-supplementation with an increased coumarate  
354 concentration (34 mM) resulted in rapid utilization of coumarate for biomass and wax esters  
355 between the time points of 27-37 h. Small amounts of 4-HBA accumulated during these 10 hours. In  
356 addition, a peak in acetate accumulation (14 mM) was observed at time point of 29 hours. At the  
357 end of the experiment at 37 hours, the obtained biomass was 5.0 g/L. The pH of the cultivation  
358 varied between pH 6.1-8.3 until finally reaching 8.7 at the end of cultivation. Intracellular wax esters  
359 were produced up to 221 mg/L at the end of the bioreactor experiment and a yield of 40 mg<sub>wax</sub>  
360 ester/g<sub>coumarate</sub> was obtained between time points 27-37. The yield is higher than previously obtained  
361 results for *A. baylyi* wild type (14-20 mg<sub>wax ester</sub>/g<sub>substrate</sub>) when using glucose or acetate as a substrate  
362 (Lehtinen et al., 2018)(Santala et al., 2018) and implicates coumarate as a potential carbon source  
363 for wax ester production.

## 364 **Conclusions**

365 The ability of microorganisms to produce industrially relevant compounds from low cost substrates,  
366 as well as the flexibility of modifying the cellular systems to produce non-native products, pave the  
367 way for a more sustainable biobased economy. Here, we showed that LDMs can be used for long  
368 chain alkyl ester (C<sub>32</sub>-C<sub>34</sub>) production – the naturally accumulated storage compounds of *A. baylyi* –  
369 as well as for the production of drop-in fuel components in the form of long chain alkanes (C<sub>17</sub>)  
370 produced by a synthetic pathway. In addition, we observed that the chemical structure of the  
371 studied LDMs affect biomass and product synthesis, coumarate being the most propitious for  
372 product and biomass formation. Thus, the choice of biomass and pre-treatment methods could be  
373 adjusted to generate LDMs that are optimal for production.

## 374 **Conflicts of interest**

375 There are no conflicts to declare.

376 **REFERENCES**

- 377 Abdelkafi F, Ammar H, Rousseau B, Tessier M, El Gharbi R, Fradet A. 2011. Structural analysis of alfa  
378 grass (*Stipa tenacissima* L.) lignin obtained by acetic acid/formic acid delignification.  
379 *Biomacromolecules* 12:3895–3902.
- 380 Adeboye PT, Bettiga M, Olsson L. 2014. The chemical nature of phenolic compounds determines  
381 their toxicity and induces distinct physiological responses in *Saccharomyces cerevisiae* in  
382 lignocellulose hydrolysates. *AMB Express* 4:46.
- 383 Alvarez HM, Steinbüchel A. 2003. Triacylglycerols in prokaryotic microorganisms. *Appl. Microbiol.*
- 384 Benndorf D, Loffhagen N, Babel W. 2001. Protein synthesis patterns in *Acinetobacter calcoaceticus*  
385 induced by phenol and catechol show specificities of responses to chemostress. *FEMS Microbiol.*  
386 *Lett.* 200:247–252.
- 387 de Berardinis V, Vallenet D, Castelli V, Besnard M, Pinet A, Cruaud C, Samair S, Lechaplais C, Gyapay  
388 G, Richez C, Durot M, Kreimeyer A, Le Fèvre F, Schächter V, Pezo V, Döring V, Scarpelli C, Médigue C,  
389 Cohen GN, Marlière P, Salanoubat M, Weissenbach J. 2008. A complete collection of single-gene  
390 deletion mutants of *Acinetobacter baylyi* ADP1. *Mol. Syst. Biol.* 4.
- 391 Bleichrodt FS, Fischer R, Gerischer UC. 2010. The  $\beta$ -keto adipate pathway of *Acinetobacter baylyi*  
392 undergoes carbon catabolite repression, cross-regulation and vertical regulation, and is affected by  
393 Crc. *Microbiology* 156:1313–1322.
- 394 Calero P, Jensen SI, Bojanovič K, Lennen RM, Koza A, Nielsen AT. 2018. Genome-wide identification  
395 of tolerance mechanisms toward p-coumaric acid in *Pseudomonas putida*. *Biotechnol. Bioeng.*  
396 115:762–774.
- 397 Cao Y-X, Xiao W-H, Zhang J-L, Xie Z-X, Ding M-Z, Yuan Y-J. 2016. Heterologous biosynthesis and  
398 manipulation of alkanes in *Escherichia coli*. *Metab. Eng.* 38:19–28.
- 399 Clark JH, Budarin V, Deswarte FEI, Hardy JJE, Kerton FM, Hunt AJ, Luque R, Macquarrie DJ, Milkowski  
400 K, Rodriguez A, Samuel O, Tavener SJ, White RJ, Wilson AJ. 2006. Green chemistry and the  
401 biorefinery: a partnership for a sustainable future. *Green Chem.* 8:853.
- 402 Constant S, Wienk HLJ, Frissen AE, Peinder P de, Boelens R, van Es DS, Grisel RJH, Weckhuysen BM,  
403 Huijgen WJJ, Gosselink RJA, Bruijninx PCA. 2016. New insights into the structure and composition of  
404 technical lignins: a comparative characterisation study. *Green Chem.* 18:2651–2665.
- 405 Dewitt S, Ervin JL, Howes-Orchison D, Dalietos D, Neidleman SL, Geigert J. 1982. Saturated and  
406 Unsaturated Wax Esters Produced by *Acinetobacter* sp. HO1-N Grown on C 16 -C 20 n -Alkanes. *J.*  
407 *Am. Oil Chem. Soc.* 59:69–74.
- 408 Dragosits M, Mattanovich D. 2013. Adaptive laboratory evolution – principles and applications for  
409 biotechnology. *Microb. Cell Fact.* 12:64.
- 410 Elliott KT, Neidle EL. 2011. *Acinetobacter baylyi* ADP1: Transforming the choice of model organism.  
411 *IUBMB Life.*
- 412 Elshahed MS. 2010. Microbiological aspects of biofuel production: Current status and future  
413 directions. *J. Adv. Res.* 1:103–111.
- 414 Fatma Z, Hartman H, Poolman MG, Fell DA, Srivastava S, Shakeel T, Yazdani SS. 2018. Model-assisted  
415 metabolic engineering of *Escherichia coli* for long chain alkane and alcohol production. *Metab. Eng.*  
416 46:1–12.



- 417 Fischer R, Bleichrodt FS, Gerischer UC. 2008. Aromatic degradative pathways in *Acinetobacter baylyi*  
418 underlie carbon catabolite repression. *Microbiology* 154:3095–3103.
- 419 FitzPatrick M, Champagne P, Cunningham MF, Whitney RA. 2010. A biorefinery processing  
420 perspective: Treatment of lignocellulosic materials for the production of value-added products.  
421 *Bioresour. Technol.* 101:8915–8922.
- 422 Fixter LM, Nagi MN, McCormack JG, Fewson CA. 1986. Structure, Distribution and Function of Wax  
423 Esters in *Acinetobacter calcoaceticus*. *Microbiology* 132:3147–3157.
- 424 Freed E, Fenster J, Smolinski SL, Walker J, Henard CA, Gill R, Eckert CA. 2018. Building a genome  
425 engineering toolbox in nonmodel prokaryotic microbes. *Biotechnol. Bioeng.* 115:2120–2138.
- 426 Fuchs G, Boll M, Heider J. 2011. Microbial degradation of aromatic compounds — from one strategy  
427 to four. *Nat. Rev. Microbiol.* 9:803–816.
- 428 Hartmans, S., Smits, J., Werf, M. v. d., Volkering, F., and Bont, J. d. (1989). Metabolism of styrene  
429 oxide and 2-phenyl ethanol in the styrene degrading *Xanthobacter* strain 124X. *Appl environ*  
430 *Microbiol* 55, 2850-2855
- 431 Harwood CS, Parales RE. 1996. The  $\beta$ -ketoacid pathway and the biology of self-identity. *Annu.*  
432 *Rev. Microbiol.* 50:553–590.
- 433 Johnson CW, Abraham PE, Linger JG, Khanna P, Hettich RL, Beckham GT. 2017. Eliminating a global  
434 regulator of carbon catabolite repression enhances the conversion of aromatic lignin monomers to  
435 muconate in *Pseudomonas putida* KT2440. *Metab. Eng. Commun.* 5:19–25.
- 436 Jönsson LJ, Martín C. 2016. Pretreatment of lignocellulose: Formation of inhibitory by-products and  
437 strategies for minimizing their effects. *Bioresour. Technol.* 199:103–112.
- 438 Kalscheuer R, Steinbüchel A. 2003. A novel bifunctional wax ester synthase/acyl-CoA:diacylglycerol  
439 acyltransferase mediates wax ester and triacylglycerol biosynthesis in *Acinetobacter calcoaceticus*  
440 ADP1. *J. Biol. Chem.* 278:8075–82.
- 441 Kannisto M, Aho T, Karp M, Santala V. 2014. Metabolic Engineering of *Acinetobacter baylyi* ADP1 for  
442 Improved Growth on Gluconate and Glucose. *Appl. Environ. Microbiol.* 80:7021–7027.
- 443 Karp EM, Nimlos CT, Deutch S, Salvachúa D, Cywar RM, Beckham GT. 2016. Quantification of acidic  
444 compounds in complex biomass-derived streams. *Green Chem.* 18:4750–4760.
- 445 Katahira R, Mittal A, McKinney K, Chen X, Tucker MP, Johnson DK, Beckham GT. 2016. Base-  
446 Catalyzed Depolymerization of Biorefinery Lignins. *ACS Sustain. Chem. Eng.* 4:1474–1486.
- 447 Kohlstedt M, Starck S, Barton N, Stolzenberger J, Selzer M, Mehlmann K, Schneider R, Pleissner D,  
448 Rinkel J, Dickschat JS, Venus J, B.J.H. van Duuren J, Wittmann C. 2018. From lignin to nylon: Cascaded  
449 chemical and biochemical conversion using metabolically engineered *Pseudomonas putida*. *Metab.*  
450 *Eng.* 47:279–293.
- 451 Kosa M, Ragauskas AJ. 2012. Bioconversion of lignin model compounds with oleaginous *Rhodococci*.  
452 *Appl. Microbiol. Biotechnol.* 93:891–900.
- 453 Lehtinen T, Efimova E, Santala S, Santala V. 2018a. Improved fatty aldehyde and wax ester  
454 production by overexpression of fatty acyl-CoA reductases. *Microb. Cell Fact.* 17:19.
- 455 Lehtinen T, Efimova E, Tremblay PL, Santala S, Zhang T, Santala V. 2017a. Production of long chain  
456 alkyl esters from carbon dioxide and electricity by a two-stage bacterial process. *Bioresour. Technol.*  
457 243:30–36.

- 458 Lehtinen T, Santala V, Santala S. 2017b. Twin-layer biosensor for real-time monitoring of alkane  
459 metabolism. *FEMS Microbiol. Lett.* 364.
- 460 Lehtinen T, Virtanen H, Santala S, Santala V. 2018b. Production of alkanes from CO<sub>2</sub> by engineered  
461 bacteria. *Biotechnol. Biofuels* 11:228.
- 462 Li M, Foster C, Kelkar S, Pu Y, Holmes D, Ragauskas A, Saffron CM, Hodge DB. 2012. Structural  
463 characterization of alkaline hydrogen peroxide pretreated grasses exhibiting diverse lignin  
464 phenotypes. *Biotechnol. Biofuels* 5:38.
- 465 Linger JG, Vardon DR, Guarnieri MT, Karp EM, Hunsinger GB, Franden MA, Johnson CW, Chupka G,  
466 Strathmann TJ, Pienkos PT, Beckham GT. 2014. Lignin valorization through integrated biological  
467 funneling and chemical catalysis. *Proc. Natl. Acad. Sci.* 111:12013–12018.
- 468 Lu F, Ralph J. 2010. Lignin. In: *Cereal Straw as a Resource for Sustainable Biomaterials and Biofuels*.  
469 Elsevier, pp. 169–207.
- 470 Metzgar D. 2004. *Acinetobacter* sp. ADP1: an ideal model organism for genetic analysis and genome  
471 engineering. *Nucleic Acids Res.* 32:5780–5790.
- 472 Nielsen DR, Leonard E, Yoon SH, Tseng HC, Yuan C, Prather KLJ. 2009. Engineering alternative  
473 butanol production platforms in heterologous bacteria. *Metab. Eng.* 11:262–273.
- 474 Ornston LN. 1966. The conversion of catechol and protocatechuate to  $\beta$ -keto adipate by  
475 *Pseudomonas putida*. II. Enzymes of the protocatechuate pathway. *J. Biol. Chem.* 241:3787–94.
- 476 Ornston LN, Stanier RY. 1966. The conversion of catechol and protocatechuate to beta-keto adipate  
477 by *Pseudomonas putida*. *J. Biol. Chem.* 241:3776–86.
- 478 Palmqvist E, Hahn-Hägerdal B. 2000. Fermentation of lignocellulosic hydrolysates. II: Inhibitors and  
479 mechanisms of inhibition. *Bioresour. Technol.* 74:25–33.
- 480 Parke D, D'Argenio DA, Ornston LN. 2000. Bacteria are not what they eat: that is why they are so  
481 diverse. *J. Bacteriol.* 182:257–63.
- 482 Parke D, Ornston N. 2003. Hydroxycinnamate (hca) catabolic genes from *Acinetobacter* sp. strain  
483 ADP1 are repressed by HcaR and are induced by hydroxycinnamoyl-coenzyme A thioesters. *Appl.*  
484 *Environ. Microbiol.* 69:5398–5409.
- 485 Peralta-Yahya PP, Zhang F, del Cardayre SB, Keasling JD. 2012. Microbial engineering for the  
486 production of advanced biofuels. *Nature* 488:320–328.
- 487 Raj A, Krishna Reddy MM, Chandra R. 2007. Identification of low molecular weight aromatic  
488 compounds by gas chromatography-mass spectrometry (GC-MS) from kraft lignin degradation by  
489 three *Bacillus* sp. *Int. Biodeterior. Biodegrad.* 59:292–296.
- 490 Reiser S, Somerville C. 1997. Isolation of mutants of *Acinetobacter calcoaceticus* deficient in wax  
491 ester synthesis and complementation of one mutation with a gene encoding a fatty acyl coenzyme A  
492 reductase. *J. Bacteriol.*
- 493 Rumbold K, van Buijsen HJ, Overkamp KM, van Groenestijn JW, Punt PJ, Werf M. 2009. Microbial  
494 production host selection for converting second-generation feedstocks into bioproducts. *Microb.*  
495 *Cell Fact.* 8:64.
- 496 Salmela M, Lehtinen T, Efimova E, Santala S, Mangayil R. 2018a. Metabolic pairing of aerobic and  
497 anaerobic production in a one-pot batch cultivation. *Biotechnol. Biofuels* 11:187.
- 498 Salmela M, Sanmark H, Efimova E, Efimov A, Hytönen VP, Lamminmäki U, Santala S, Santala V.

- 499 2018b. Molecular tools for selective recovery and detection of lignin-derived molecules. Green  
500 Chem.
- 501 Santala S, Efimova E, Karp M, Santala V. 2011. Real-Time monitoring of intracellular wax ester  
502 metabolism. *Microb. Cell Fact.* 10:75.
- 503 Santala S, Efimova E, Koskinen P, Karp MT, Santala V. 2014. Rewiring the Wax Ester Production  
504 Pathway of *Acinetobacter baylyi* ADP1. *ACS Synth. Biol.* 3:145–151.
- 505 Santala S, Efimova E, Santala V. 2018. Dynamic decoupling of biomass and wax ester biosynthesis in  
506 *Acinetobacter baylyi* by an autonomously regulated switch. *Metab. Eng. Commun.* 7:e00078.
- 507 Schirmer A, Rude MA, Li X, Popova E, del Cardayre SB. 2010. Microbial biosynthesis of alkanes.  
508 *Science* 329:559–62.
- 509 Steen EJ, Kang Y, Bokinsky G, Hu Z, Schirmer A, McClure A, del Cardayre SB, Keasling JD. 2010.  
510 Microbial production of fatty-acid-derived fuels and chemicals from plant biomass. *Nature* 463:559–  
511 562.
- 512 Stöveken T, Steinbüchel A. 2008. Bacterial Acyltransferases as an Alternative for Lipase-Catalyzed  
513 Acylation for the Production of Oleochemicals and Fuels. *Angew. Chemie Int. Ed.* 47:3688–3694.
- 514 Sun RC, Sun XF, Zhang SH. 2001. Quantitative determination of hydroxycinnamic acids in wheat, rice,  
515 rye, and barley straws, maize stems, oil palm frond fiber, and fast-growing poplar wood. *J. Agric.*  
516 *Food Chem.* 49:5122–5129.
- 517 Sun S, Wen J, Sun S, Sun R-C. 2015. Systematic evaluation of the degraded products evolved from  
518 the hydrothermal pretreatment of sweet sorghum stems. *Biotechnol. Biofuels* 8:37.
- 519 Uthoff S, Stöveken T. 2005. Thio wax ester biosynthesis utilizing the unspecific bifunctional wax ester  
520 synthase/acyl coenzyme A: diacylglycerol acyltransferase of *Acinetobacter* sp. strain ADP1. *Appl. ....*
- 521 Wells T, Ragauskas AJ. 2012. Biotechnological opportunities with the  $\beta$ -keto adipate pathway. *Trends*  
522 *Biotechnol.*
- 523 Zimmermann T, Sorg T, Siehler SY, Gerischer U. 2009. Role of *Acinetobacter baylyi* *crc* in catabolite  
524 repression of enzymes for aromatic compound catabolism. *J. Bacteriol.* 191:2834–2842.
- 525
- 526

527 **Table 1:** Carbon source depletion presented as consumed substrate per supplemented substrate (%)  
 528 and growth as OD<sub>600</sub> by the WP strain measured at three time points (8, 12 and 24h). Batches were  
 529 supplement either with acetate, coumarate and casein amino acids, acetate and casein amino acids  
 530 or casein amino acids. Results are presented for three biological replicates with standard deviation  
 531 marked as ±.

|         | 25 mM acetate, 15 mM coumarate and 0.2% casein amino acids |                     |           | 25 mM acetate and 0.2% casein amino acids |           | 0.2% casein amino acids |
|---------|------------------------------------------------------------|---------------------|-----------|-------------------------------------------|-----------|-------------------------|
| Time, h | Coumarate consumed, %                                      | Acetate consumed, % | OD        | Acetate consumed, %                       | OD        | OD                      |
| 8       | 28.7±3.5                                                   | 45.0±3.5            | 1.60±0.10 | 88±14                                     | 1.49±0.27 | 0.16±0.03               |
| 12      | 100.0                                                      | 100.0               | 3.43±1.81 | 100                                       | 1.45±0.08 | 0.19±0.02               |
| 24      | 100.0                                                      | 100.0               | 2.01±0.17 | 100                                       | 0.66±0.34 | 0.16±0.01               |

532

533 **Table 2:** Carbon source depletion presented as consumed substrate per supplemented substrate (%)  
 534 and growth as OD<sub>600</sub> by the AP strain measured at three time points (8, 12 and 24h Batches were  
 535 supplement either with acetate, coumarate and casein amino acids, acetate and casein amino acids  
 536 or casein amino acids. Results are presented for three biological replicates with standard deviation  
 537 marked as ±.

|         | 25 mM acetate, 15 mM coumarate and 0.2% casein amino acids |                     |           | 25 mM acetate and 0.2% casein amino acids |             | 0.2% casein amino acids |
|---------|------------------------------------------------------------|---------------------|-----------|-------------------------------------------|-------------|-------------------------|
| Time, h | Coumarate consumed, %                                      | Acetate consumed, % | OD        | Acetate consumed, %                       | OD          | OD                      |
| 8       | 94.7±0.5                                                   | 82.8±4.35           | 1.87±0.13 | 100                                       | 1.43±0.0.22 | 0.12±0.03               |
| 12      | 100.0                                                      | 100.0               | 2.51±0.17 | 100                                       | 1.12±0.08   | 0.11±0.02               |
| 24      | 100.0                                                      | 100.0               | 2.10±0.06 | 100                                       | 0.66±0.03   | 0.16±0.01               |

538

539 **Figure 1:** The schematic presentation of carbon flow from lignin-derived monomers (LDMs;  
 540 coumarate, ferulate, caffeate) into products. The structurally analogous LDMs are first funneled into  
 541 a single intermediate, protocatechuate. After ring cleavage, the intermediate is metabolized by the  
 542 β-ketoadipate pathway yielding acetyl-CoA and succinyl-CoA. From acetyl-CoA, two different  
 543 pathways for possible products (1A for wax esters, 1B for alkanes) are shown. In the native wax ester  
 544 synthesis pathway, first the fatty acyl-CoA is produced and then fatty alcohols *via* a fatty aldehyde

545 intermediate. The fatty alcohols are esterified with fatty acyl-CoAs resulting in wax esters. In the  
546 alkane producing strain, the natural fatty aldehyde reductase gene *acr1* has been replaced with a  
547 non-native reductase gene, *aar*. The fatty aldehydes produced by AAR are further converted to  
548 alkanes by another heterologous enzyme, aldehyde deformylating oxygenase, ADO.

549 **Figure 2.** Biomass and product formation by the WP strain utilizing different LDMs as substrates.  
550 Error bars have been left out from the A) and B) for clarity and are available in supplementary  
551 material (Figure S1). **A)** Cell growth measured as optical density at 600 nm every 30 minutes. Carbon  
552 sources used: 25 mM acetate and 0.2% casein amino acids with 15 mM coumarate (closed square),  
553 ferulate (open circle) or caffeate (closed circle) supplementation. Control cultivations supplemented  
554 with 25 mM acetate and casein amino acids (cross) or casein amino acids (star). The results are the  
555 average of three biological replicates. **B)** Real-time luminescence signal representing the internal  
556 aldehyde (wax ester precursor) formation measured every 30 minutes. The results are the average  
557 of three biological replicates. **C)** Cumulative luminescence signals representing relative product  
558 formation from the different LDMs. The results are the average of three biological replicates and  
559 error bars represent standard deviation.

560 **Figure 3.** Biomass and product formation by the AP strain utilizing different LDMs as substrates.  
561 Error bars have been left out from the A) and B) for clarity and are available in supplementary  
562 material (Figure S1). **A)** Cell growth measured as optical density at 600 nm every 30 minutes. Carbon  
563 sources used: 25 mM acetate and 0.2% casein amino acids with 15 mM coumarate (closed square),  
564 ferulate (open circle) or caffeate (closed circle) supplementation. Control cultivations supplemented  
565 with 25 mM acetate and casein amino acids (cross) or casein amino acids (star). The results are the  
566 average of three biological replicates. **B)** Real-time luminescence signal representing the internal  
567 aldehyde (alkane precursor) formation measured every 30 minutes. The results are the average of  
568 three biological replicates. **C)** Cumulative luminescence signals representing relative product  
569 formation from the different LDMs. The results are the average of three biological replicates and

570 error bars represent standard deviation. **C)** Cumulative luminescence signals representing relative  
571 product formation from the different LDMs. The results are the average of three biological replicates  
572 and error bars represent standard deviation. **D)** Normalized fluorescence signals  
573 (fluorescence/OD<sub>600</sub>) representing alkane production from LDMs. The results are the average of  
574 three biological replicates and error bars represent the standard deviation of the samples.

575 **Figure 4:** The effect of increasing acetate and coumarate concentrations on growth and aldehyde  
576 formation by the WP strain cultivated for 48 hours. **A)** Growth profiles as optical density (OD<sub>600</sub>)  
577 measured every 30 minutes. Substrate concentrations used: 25mM acetate and 15 mM coumarate  
578 (cross), 30 mM acetate and 15 mM coumarate (open circle), 50mM acetate and 25 mM coumarate  
579 (open square) 55 mM acetate and 30 mM coumarate (closed square), 75 mM acetate and 40 mM  
580 coumarate (open triangle) and 90 mM acetate and 50 mM coumarate (closed triangle). **B)**  
581 Cumulative luminescence signal from the different carbon sources at the end of the experiment (48  
582 h). Error bars represent the standard deviation of three biological replicates. Error bars have been  
583 left out for clarity and are available in supplementary material (Figure S2).

584 **Figure 5.** Semi-quantitative TLC analysis of the wax esters produced by the WP strain at different  
585 time points. Samples were grown on 25 mM acetate, 15 mM coumarate and 0.2% casein amino  
586 acids (lanes 1, 2 and 3), 25 mM acetate and 0.2% casein amino acids (lanes 4, 5 and 6) or 0.2% casein  
587 amino acids (lanes 7, 8 and 9). Lanes 0 and 10 represent the wax ester standard (Jojoba oil). Time  
588 points for each sample (8h, 12h and 24h) are shown at the top of the figure.

589 **Figure 6.** Heptadecane production as µg/L by the AP strain from 25 mM coumarate, 15 mM acetate  
590 and 0.2% casein amino acids (white columns), 25 mM acetate and 0.2% casein amino acids (grey  
591 columns) and 0.2% casein amino acids (striped grey columns) at 8h, 12 h and 24h. The error bars  
592 represent the standard deviation from three biological replicates.

593 **Figure 7:** Bioreactor experiment for wax ester accumulation by the WP strain. **A)** Substrate  
594 concentrations (mM) of coumarate (open square), 4-HBA (open circle) and acetate (closed square)

595 during 37 hours of cultivation. Initially, the reactor was supplemented only with acetate and  
596 coumarate. At time points 10.5 h and 26.5 h, the cultivations were re-supplemented with  
597 coumarate. 4-HBA is produced as an intermediate of coumarate conversion. **B)** Wax ester titer as  
598 mg/L (columns), biomass formation as cell dry weight in g/L (open circles), partial oxygen pressure as  
599 percentage (dotted line) and pH (line) during 37 hours of cultivation. Please note, that the right y-  
600 axis starts at -5 to indicate wax ester content of 0 mg/l at time points 10, 10.5 and 26.5 h.

601 **Supplementary Figure S1.** Optical densities and luminescence counts from Figures 2A, 2B, 3A and 3B  
602 presented with error bars. Error bars represent the standard deviation from three biological  
603 replicates.

604 **Supplementary Figure S2.** Optical densities from Figure 4 presented with error bars. Error bars  
605 represent the standard deviation from three biological replicates.

606 **Supplementary Figure S3.** *A. baylyi* wild type substrate consumption in a 50 ml batch cultivation  
607 supplemented with 25 mM acetate (black square) and 15 mM coumarate (open square). 4-HBA  
608 (black diamond) accumulates as an overflow metabolite from coumarate conversion. Cell growth  
609 measured as OD<sub>600</sub> (open circle).

610 **Supplementary Figure S3.** GC-MS chromatogram showing the increase of 8-heptadecene (RT 11.8)  
611 and decrease in heptadecane (RT 11.9). Blue line t=24h, black line t=12.

# LDM

bioRxiv preprint doi: <https://doi.org/10.1101/502468>; this version posted December 21, 2018. The copyright holder for this preprint (which was not certified by peer review) is the author/funder, who has granted bioRxiv a license to display the preprint in perpetuity. It is made available under aCC-BY-NC 4.0 International license.

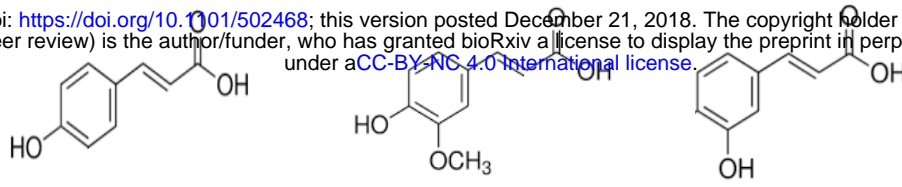

Coumarate

Ferulate

Caffeate

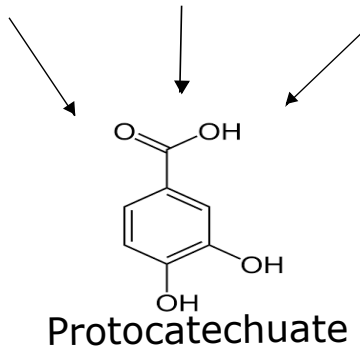

Protocatechuate

$\beta$ -ketoacid pathway

Acetyl-CoA, Succinyl-CoA  $\rightarrow$  **Biomass**

1A

1B

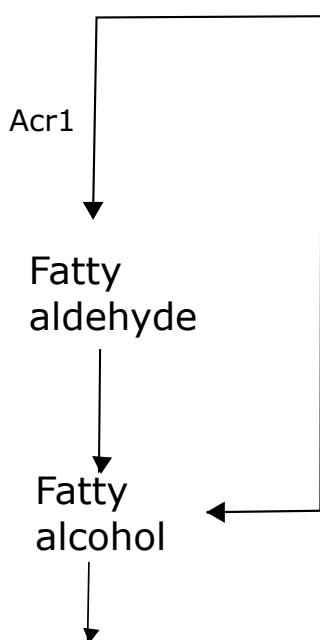

**Wax ester**

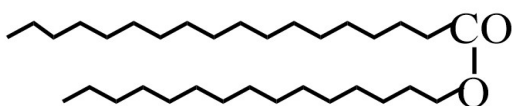

Fatty acyl-CoA

Aar

Fatty aldehyde

ADO

**Alkane**

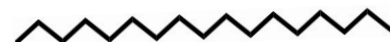



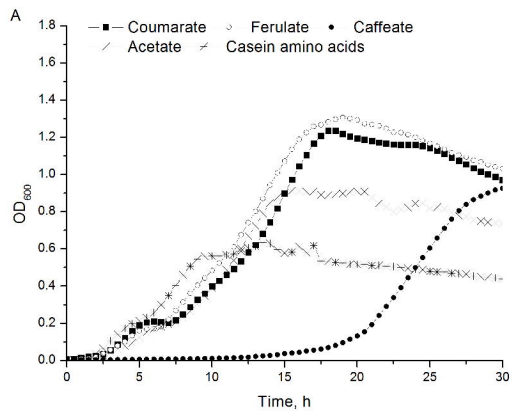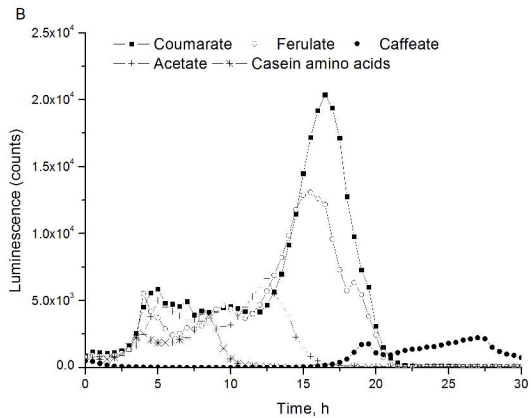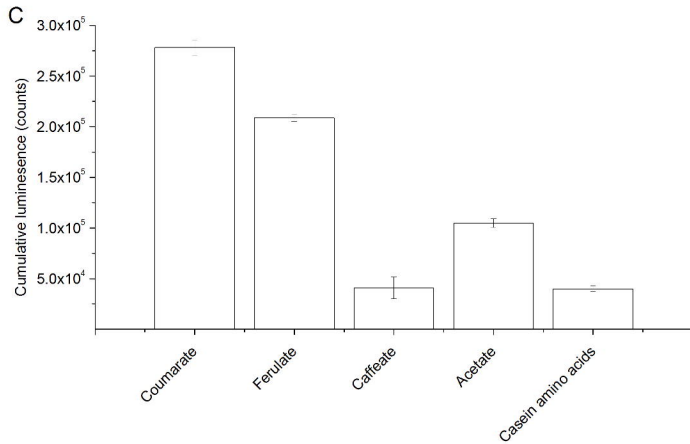

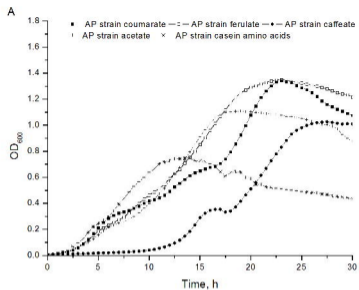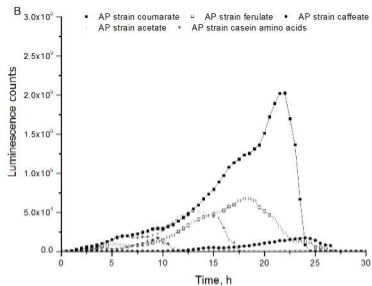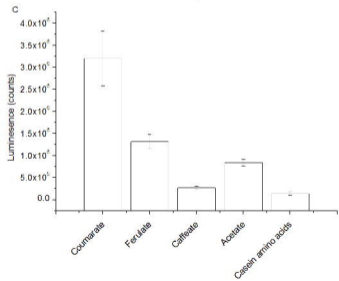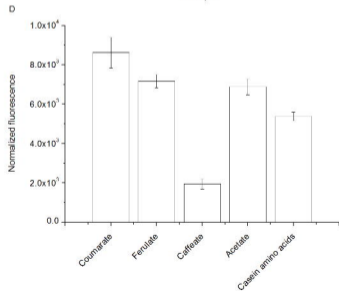

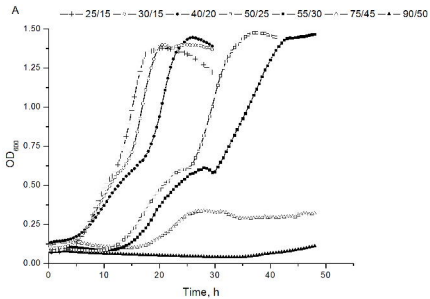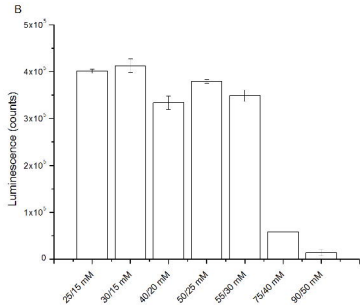

8h

12h

24h

8h

12h

24h

8h

12h

24h

WE

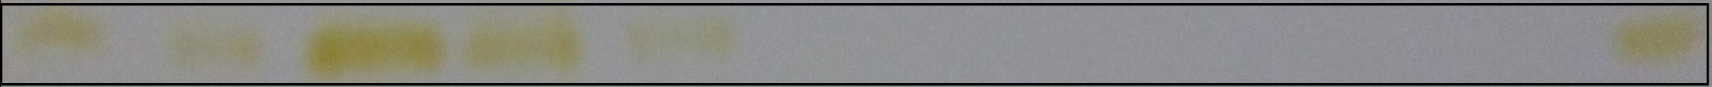

0

1

2

3

4

5

6

7

8

9

10

WE standard

Coumarate and acetate supplementation

Acetate control

Casein amino acids control

WE standard

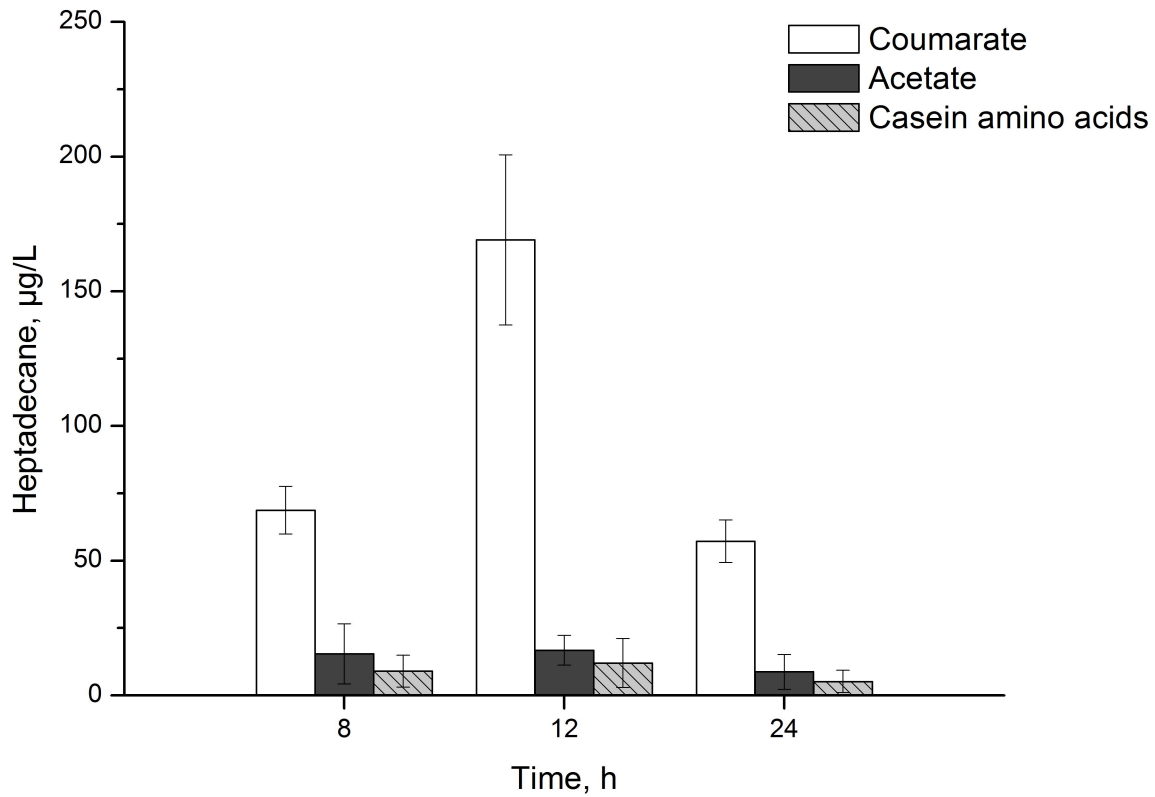

A

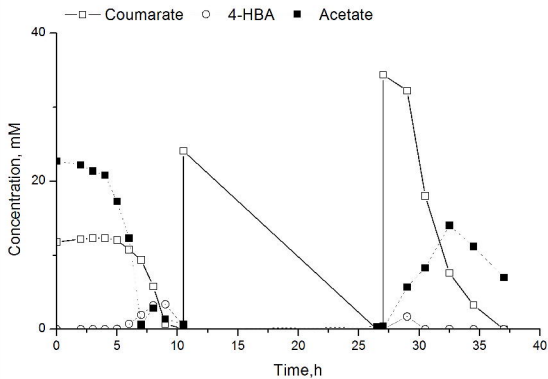

B

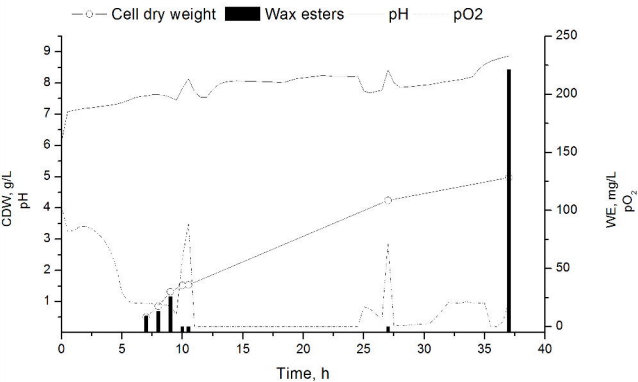

Source: http://biorxiv.org/content/10.1101/502468v1.full.pdf
